# Supplementary material for: Evaluation of a clinical decision rule to guide antibiotic prescription in children with suspected lower respiratory tract infection in The Netherlands: A stepped-wedge cluster randomised trial
Source: PubMed Central journal article supplement (PMC6993966; doi:10.1371/journal.pmed.1003034), 2020-01-31
Supplement: pmed.1003034.s002.pdf [file pmed.1003034.s002.pdf]

## Comparison of included and non-included children

|                                   | Included<br>n=999 | Non-included<br>n=677 |
|-----------------------------------|-------------------|-----------------------|
| <b>General characteristics</b>    |                   |                       |
| Male sex                          | 610/999 (61%)     | 432/674 (64%)         |
| Age in months*                    | 17 (9 - 30)       | 12 (6 - 24)           |
| Triage level*                     |                   |                       |
| - <i>Immediate or very urgent</i> | 488/908 (54%)     | 251/641 (39%)         |
| - <i>Urgent</i>                   | 267/908 (29%)     | 266/641 (41%)         |
| - <i>Standard or non-urgent</i>   | 83/908 (9%)       | 124/641 (19%)         |
| Antibiotic prescription*          | 280/999 (28%)     | 106/677 (16%)         |
| Hospitalization*                  | 510/999 (51%)     | 242/677 (36%)         |

\* significant difference between included and non-included children, based on t-test for continuous outcomes and based on chi-squared test for categorical outcomes.
