# Supplementary material for: Evaluation of a clinical decision rule to guide antibiotic prescription in children with suspected lower respiratory tract infection in The Netherlands: A stepped-wedge cluster randomised trial
Source: PubMed Central journal article supplement (PMC6993966; doi:10.1371/journal.pmed.1003034), 2020-01-31
Supplement: pmed.1003034.s003.pdf [file pmed.1003034.s003.pdf]

## Baseline characteristics per hospital

|                                         | Overall<br>n = 999 |             | Hospital A<br>n = 196 |             | Hospital B<br>n = 85 |             | Hospital C<br>n = 46 |           | Hospital D<br>n = 164 |             | Hospital E<br>n = 31 |             | Hospital F<br>n = 98 |             | Hospital G<br>n = 211 |             | Hospital H<br>n = 168 |           |
|-----------------------------------------|--------------------|-------------|-----------------------|-------------|----------------------|-------------|----------------------|-----------|-----------------------|-------------|----------------------|-------------|----------------------|-------------|-----------------------|-------------|-----------------------|-----------|
|                                         | n / median         | %/IQR       | General hospital      |             | General hospital     |             | Tertiary hospital    |           | General hospital      |             | General hospital     |             | General hospital     |             | General hospital      |             | General hospital      |           |
| <b>General characteristics</b>          |                    |             |                       |             |                      |             |                      |           |                       |             |                      |             |                      |             |                       |             |                       |           |
| Male sex                                | 611                | 61%         | 114                   | 58%         | 58                   | 68%         | 31                   | 67%       | 97                    | 59%         | 17                   | 55%         | 54                   | 55%         | 138                   | 65%         | 101                   | 60%       |
| Age in months                           | 17                 | 9 - 30      | 13                    | 8 - 25      | 18                   | 10 - 33     | 22                   | 11 - 37   | 15                    | 8 - 30      | 19                   | 12 - 27     | 14                   | 9 - 26      | 20                    | 10 - 34     | 16                    | 9 - 28    |
| Season                                  |                    |             |                       |             |                      |             |                      |           |                       |             |                      |             |                      |             |                       |             |                       |           |
| - Spring                                | 190                | 19%         | 39                    | 20%         | 16                   | 19%         | 7                    | 15%       | 29                    | 18%         | 3                    | 10%         | 16                   | 16%         | 38                    | 18%         | 42                    | 25%       |
| - Summer                                | 104                | 10%         | 21                    | 11%         | 4                    | 5%          | 4                    | 9%        | 16                    | 10%         | 2                    | 6%          | 9                    | 9%          | 19                    | 9%          | 29                    | 17%       |
| - Autumn                                | 287                | 29%         | 43                    | 22%         | 22                   | 26%         | 18                   | 39%       | 56                    | 34%         | 12                   | 39%         | 32                   | 33%         | 70                    | 33%         | 34                    | 20%       |
| - Winter                                | 431                | 43%         | 93                    | 47%         | 43                   | 51%         | 17                   | 37%       | 66                    | 40%         | 14                   | 45%         | 41                   | 42%         | 84                    | 40%         | 63                    | 38%       |
| Way of referral                         |                    |             |                       |             |                      |             |                      |           |                       |             |                      |             |                      |             |                       |             |                       |           |
| - General practitioner                  | 739                | 74%         | 148                   | 76%         | 56                   | 66%         | 19                   | 41%       | 137                   | 84%         | 18                   | 58%         | 84                   | 86%         | 136                   | 64%         | 138                   | 82%       |
| - Self                                  | 111                | 11%         | 11                    | 6%          | 4                    | 5%          | 11                   | 24%       | 8                     | 5%          | 1                    | 3%          | 3                    | 3%          | 61                    | 29%         | 12                    | 7%        |
| - Other                                 | 110                | 11%         | 30                    | 15%         | 7                    | 8%          | 11                   | 24%       | 17                    | 10%         | 12                   | 39%         | 11                   | 11%         | 13                    | 6%          | 9                     | 5%        |
| <b>Signs and symptoms</b>               |                    |             |                       |             |                      |             |                      |           |                       |             |                      |             |                      |             |                       |             |                       |           |
| Ill appearance                          | 359                | 36%         | 80                    | 41%         | 25                   | 29%         | 12                   | 26%       | 89                    | 54%         | 7                    | 23%         | 37                   | 38%         | 68                    | 32%         | 40                    | 24%       |
| Duration of fever in days               | 2                  | 1-4         | 2                     | 1 - 4       | 3                    | 1 - 4       | 3                    | 1 - 5     | 2                     | 1 - 3       | 2                    | 1 - 4       | 2                    | 1 - 4       | 2                     | 1 - 3       | 2                     | 1 - 3     |
| Temperature                             | 38.8               | 38.1 - 39.5 | 38.9                  | 38.2 - 39.5 | 38.8                 | 38.1 - 39.1 | 39.1                 | 38 - 39.7 | 38.9                  | 38.1 - 39.6 | 38.5                 | 37.5 - 39.2 | 38.6                 | 37.8 - 39.2 | 39.0                  | 38.5 - 39.6 | 38.6                  | 38 - 39.4 |
| Hypoxia (sat <94%)                      | 218                | 22%         | 36                    | 18%         | 14                   | 16%         | 10                   | 22%       | 44                    | 27%         | 3                    | 10%         | 30                   | 31%         | 56                    | 27%         | 25                    | 15%       |
| Tachycardia                             | 691                | 69%         | 124                   | 63%         | 60                   | 71%         | 32                   | 70%       | 123                   | 75%         | 23                   | 74%         | 71                   | 72%         | 133                   | 63%         | 124                   | 74%       |
| Tachypnea                               | 804                | 80%         | 140                   | 71%         | 69                   | 81%         | 35                   | 76%       | 139                   | 85%         | 18                   | 58%         | 87                   | 89%         | 169                   | 80%         | 145                   | 86%       |
| Retractions present                     | 614                | 61%         | 106                   | 54%         | 57                   | 67%         | 20                   | 43%       | 114                   | 70%         | 17                   | 55%         | 59                   | 60%         | 150                   | 71%         | 90                    | 54%       |
| Dyspnea present                         | 723                | 72%         | 133                   | 68%         | 64                   | 75%         | 27                   | 59%       | 138                   | 84%         | 21                   | 68%         | 59                   | 60%         | 161                   | 76%         | 119                   | 71%       |
| Wheezing                                | 366                | 37%         | 60                    | 31%         | 31                   | 36%         | 11                   | 24%       | 69                    | 42%         | 11                   | 35%         | 21                   | 21%         | 92                    | 44%         | 70                    | 42%       |
| Prolonged capillary refill (≥2 seconds) | 116                | 12%         | 21                    | 11%         | 4                    | 5%          | 4                    | 9%        | 33                    | 20%         | 0                    | 0%          | 15                   | 15%         | 31                    | 15%         | 7                     | 4%        |
| <b>Diagnostics and treatment</b>        |                    |             |                       |             |                      |             |                      |           |                       |             |                      |             |                      |             |                       |             |                       |           |
| CRP performed                           | 756                | 76%         | 136                   | 69%         | 78                   | 92%         | 39                   | 85%       | 90                    | 55%         | 27                   | 87%         | 84                   | 86%         | 137                   | 65%         | 165                   | 98%       |
| CRP in mg/L                             | 18                 | 7 - 41      | 14                    | 7 - 28      | 20                   | 10 - 47     | 17                   | 5 - 33    | 21                    | 7 - 50      | 9                    | 5 - 33      | 26                   | 8 - 59      | 22                    | 8 - 38      | 18                    | 5 - 42    |
| Chest x-ray performed                   | 159                | 16%         | 17                    | 9%          | 10                   | 12%         | 6                    | 13%       | 37                    | 23%         | 14                   | 45%         | 21                   | 21%         | 37                    | 18%         | 16                    | 10%       |
| Oxygen therapy                          | 415                | 41%         | 65                    | 33%         | 30                   | 35%         | 14                   | 30%       | 102                   | 62%         | 9                    | 29%         | 47                   | 48%         | 80                    | 38%         | 68                    | 40%       |
| Antibiotic prescription                 | 281                | 28%         | 36                    | 18%         | 17                   | 20%         | 17                   | 37%       | 65                    | 40%         | 6                    | 19%         | 37                   | 38%         | 63                    | 30%         | 39                    | 23%       |
| Hospitalization                         | 511                | 51%         | 88                    | 45%         | 39                   | 46%         | 19                   | 41%       | 119                   | 73%         | 10                   | 32%         | 58                   | 59%         | 91                    | 43%         | 86                    | 51%       |
