# Supplementary material for: Evaluation of a clinical decision rule to guide antibiotic prescription in children with suspected lower respiratory tract infection in The Netherlands: A stepped-wedge cluster randomised trial
Source: PubMed Central journal article supplement (PMC6993966; doi:10.1371/journal.pmed.1003034), 2020-01-31
Supplement: pmed.1003034.s004.pdf [file pmed.1003034.s004.pdf]

### Antibiotic prescription per hospital and per time period

| Time period | 1           | 2          | 3          | 4          | 5           | 6          | 7          | 8          | 9           |
|-------------|-------------|------------|------------|------------|-------------|------------|------------|------------|-------------|
| Hospital    | n/N (%)     | n/N (%)    | n/N (%)    | n/N (%)    | n/N (%)     | n/N (%)    | n/N (%)    | n/N (%)    | n/N (%)     |
| <b>A</b>    | 11/69 (16%) | 0/7 (0%)   | 2/9 (22%)  | 2/12 (17%) | 5/28 (18%)  | 5/15 (33%) | 4/20 (5%)  | 5/17 (29%) | 2/19 (11%)  |
| <b>B</b>    | 8/33 (24%)  | 0/2 (0%)   | 1/3 (33%)  | 0/6 (0%)   | 1/16 (6%)   | 2/15 (13%) | 1/3 (33%)  | 1/1 (100%) | 3/6 (50%)   |
| <b>C</b>    | 10/27 (37%) | 0/1 (0%)   | 1/1 (100%) | 1/5 (20%)  | 0/3 (0%)    | 0/1 (0%)   | 2/3 (67%)  | 1/2 (50%)  | 2/3 (67%)   |
| <b>D</b>    | 35/74 (47%) | 3/6 (50%)  | 1/8 (13%)  | 3/7 (43%)  | 6/23 (26%)  | 3/9 (33%)  | 0/4 (0%)   | 3/5 (60%)  | 11/28 (39%) |
| <b>E</b>    | 0/0 (0%)    | 0/0 (0%)   | 1/5 (20%)  | 0/3 (0%)   | 3/12 (25%)  | 0/2 (0%)   | 0/3 (0%)   | 0/1 (0%)   | 2/5 (40%)   |
| <b>F</b>    | 23/52 (44%) | 0/0 (0%)   | 1/4 (25%)  | 4/8 (50%)  | 0/9 (0%)    | 2/9 (22%)  | 2/5 (40%)  | 0/0 (0%)   | 5/11 (45%)  |
| <b>G</b>    | 1/1 (100%)  | 3/17 (18%) | 1/12 (8%)  | 5/23 (22%) | 19/51 (37%) | 6/20 (30%) | 5/20 (25%) | 5/10 (50%) | 18/57 (32%) |
| <b>H</b>    | 27/71 (38%) | 0/3 (0%)   | 0/2 (0%)   | 1/6 (17%)  | 1/10 (10%)  | 2/11 (18%) | 1/13 (8%)  | 1/7 (14%)  | 6/45 (13%)  |

Footnote: dark blue = pre-intervention period; light blue = intervention period.
