# Supplementary material for: Evaluation of a clinical decision rule to guide antibiotic prescription in children with suspected lower respiratory tract infection in The Netherlands: A stepped-wedge cluster randomised trial
Source: PubMed Central journal article supplement (PMC6993966; doi:10.1371/journal.pmed.1003034), 2020-01-31
Supplement: pmed.1003034.s005.pdf [file pmed.1003034.s005.pdf]

## Detailed outcomes per risk group

|                                                | Pre-intervention | Intervention |
|------------------------------------------------|------------------|--------------|
|                                                | n / N (%)        | n / N (%)    |
| <b>Low-intermediate risk population (≤10%)</b> |                  |              |
| Antibiotic prescription*                       | 29/172 (17%)     | 15/234 (6%)  |
| Strategy failure*                              | 29/159 (18%)     | 39/218 (18%) |
| Strategy failure: reasons                      |                  |              |
| - <i>Secondary antibiotic prescription</i>     | 7/159 (4%)       | 20/218 (9%)  |
| - <i>Changed antibiotics during follow-up</i>  | 1/159 (1%)       | 0/218 (0%)   |
| - <i>Secondary hospitalization</i>             | 7/159 (4%)       | 11/218 (5%)  |
| - <i>Oxygen need at day 7</i>                  | 3/159 (2%)       | 0/218 (0%)   |
| - <i>Fever at day 7</i>                        | 11/159 (7%)      | 8/218 (4%)   |
| <b>High-risk population (&gt;10%)</b>          |                  |              |
| Antibiotic prescription*                       | 75/159 (47%)     | 83/140 (59%) |
| Strategy failure*                              | 42/155 (27%)     | 20/136 (15%) |
| Strategy failure: reasons                      |                  |              |
| - <i>Secondary antibiotic prescription</i>     | 18/155 (12%)     | 8/136 (6%)   |
| - <i>Changed antibiotics during follow-up</i>  | 6/155 (4%)       | 5/136 (4%)   |
| - <i>Secondary hospitalization</i>             | 3/155 (2%)       | 2/136 (1%)   |
| - <i>Oxygen need at day 7</i>                  | 2/155 (1%)       | 1/136 (1%)   |
| - <i>Fever at day 7</i>                        | 13/155 (8%)      | 4/136 (3%)   |
| <b>Feverkidstool missing†</b>                  |                  |              |
| Antibiotic prescription                        | 75/266 (28%)     | 3/28 (11%)   |
| Strategy failure                               | 60/258 (23%)     | 2/27 (7%)    |
| Strategy failure: reasons                      |                  |              |
| - <i>Secondary antibiotic prescription</i>     | 20/258 (8%)      | 1/27 (4%)    |
| - <i>Changed antibiotics during follow-up</i>  | 7/258 (3%)       | 0/27 (0%)    |
| - <i>Secondary hospitalization</i>             | 6/258 (2%)       | 0/27 (0%)    |
| - <i>Oxygen need at day 7</i>                  | 4/258 (2%)       | 0/27 (0%)    |
| - <i>Fever at day 7</i>                        | 23/258 (9%)      | 1/27 (4%)    |

### Footnote:

\* The pre-intervention and intervention populations in a stepped-wedge trial cannot be directly compared, but should be adjusted for a secular time-trend;(1) the adjusted analyses of the primary outcomes antibiotic prescription and strategy failure are presented in table 2 of the manuscript.

† In these children no risk could be calculated due to missing Feverkidstool variables, therefore these populations cannot be compared.
